# Supplementary material
Source: publisher figshare collection journal article supplement (https://frontiersin.figshare.com/ndownloader/files/30995227)

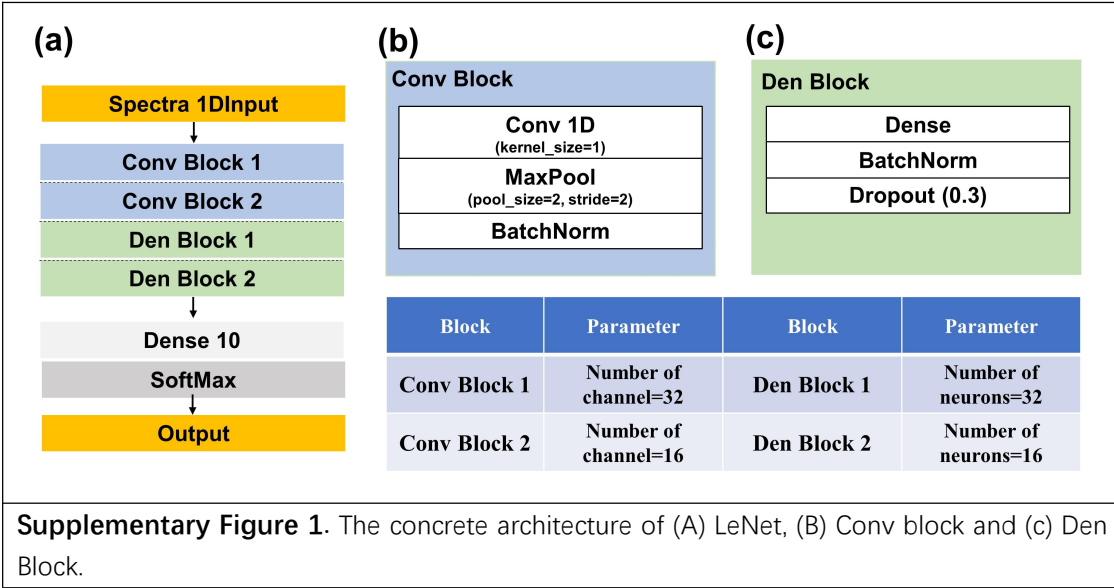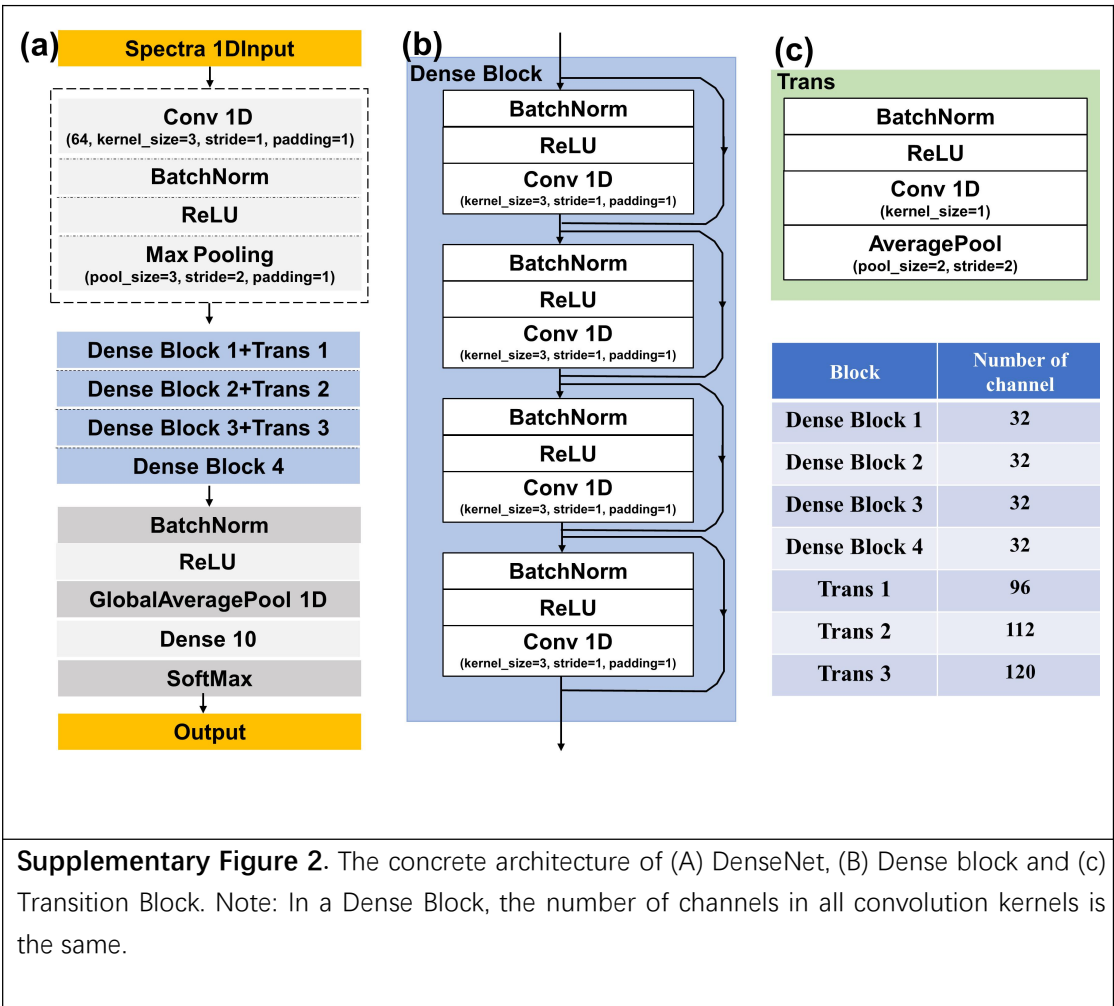

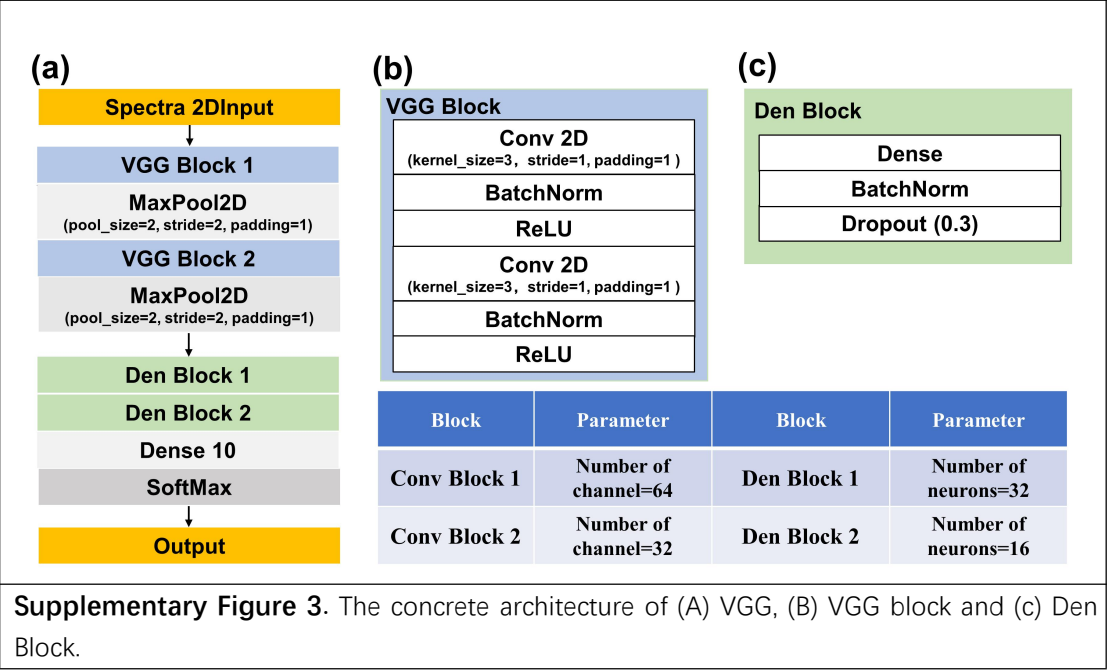

Supplement: Supplementary file [file 30995227]
